# Supplementary material
Source: ML conference proceedings conference paper supplement (https://proceedings.neurips.cc/paper_files/paper/2020/hash/45f31d16b1058d586fc3be7207b58053-Abstract.html)
Supplement: Supplementary file [file 45f31d16b1058d586fc3be7207b58053-Supplemental.pdf]

---

# Supplement: Proximity Operator of the Matrix Perspective Function and its Applications

---

**Joong-Ho Won**

Department of Statistics  
Seoul National University  
wonj@stats.snu.ac.kr

## A Proofs

### A.1 A key lemma

Proofs of both Theorems 2 and 4 are based on the following key lemma, Lemma A.1. Recall that  $\phi(x) = x_+$  for  $x \in \mathbb{R}$  and  $\phi^\square(\mathbf{X}) = \mathbf{P} \text{diag}(\phi(\lambda_1), \dots, \phi(\lambda_n)) \mathbf{P}^T = \mathbf{X}_+$  for  $\mathbf{X} = \mathbf{P} \text{diag}(\lambda_1, \dots, \lambda_n) \mathbf{P}^T \in \mathbb{S}^n$  where  $\mathbf{P}$  satisfies  $\mathbf{P}^T \mathbf{P} = \mathbf{P} \mathbf{P}^T = \mathbf{I}$ . For any  $\boldsymbol{\lambda} = (\lambda_1, \dots, \lambda_n)$ ,  $\phi^{[1]}(\boldsymbol{\lambda})$  is the  $n \times n$  symmetric matrix with  $(i, j)$  entry

$$\phi_{ij}^{[1]}(\boldsymbol{\lambda}) = \begin{cases} \frac{\phi(\lambda_i) + \phi(\lambda_j)}{|\lambda_i| + |\lambda_j|}, & \lambda_i \neq 0 \text{ or } \lambda_j \neq 0, \\ 0, & \lambda_i = \lambda_j = 0. \end{cases} \quad (18)$$

Also recall that  $\mathbf{C}(\mu) = \bar{\mathbf{X}} - \mu \mathbf{e} \mathbf{e}^T$  so that  $f(\mu) = g'(\mu) = 1 - \mathbf{e}^T \phi^\square(\mathbf{C}(\mu)) \mathbf{e}$ . Lemma A.1 provides a closed-form expression of the derivative of  $f(\mu)$  when it exists, in terms of the matrix function (18).

**Lemma A.1.** *Function  $f$  is differentiable at  $\mu$  if and only if  $\mathbf{e} \in \mathcal{N}(\mathbf{C}(\mu))^\perp$ . In this case, the derivative is*

$$f'(\mu) = \mathbf{e}^T \mathbf{P} (\phi^{[1]}(\boldsymbol{\lambda}) \circ (\mathbf{P}^T \mathbf{e} \mathbf{e}^T \mathbf{P})) \mathbf{P}^T \mathbf{e}, \quad (\text{A.1})$$

for any  $\boldsymbol{\lambda} = (\lambda_1, \dots, \lambda_n)^T$  and  $\mathbf{P}$  satisfying  $\mathbf{C}(\mu) = \mathbf{P} \text{diag}(\lambda_1, \dots, \lambda_n) \mathbf{P}^T$ ,  $\mathbf{P}^T \mathbf{P} = \mathbf{P} \mathbf{P}^T = \mathbf{I}$ .

To prove this lemma, we begin by recalling the definition of directional derivatives.

**Definition A.1** (Directional derivative). *For a function  $F : \mathbb{R}^m \rightarrow \mathbb{R}^l$  and  $\mathbf{x}, \mathbf{h} \in \mathbb{R}^m$ , the directional derivative of  $F$  at  $\mathbf{x}$  along  $\mathbf{h}$  is defined and denoted by*

$$F'(\mathbf{x}; \mathbf{h}) = \lim_{t \downarrow 0} \frac{F(\mathbf{x} + t\mathbf{h}) - F(\mathbf{x})}{t}$$

if the limit exists. The  $F$  is called directionally differentiable at  $\mathbf{x}$  if  $F'(\mathbf{x}; \mathbf{h})$  exists for all  $\mathbf{h} \in \mathbb{R}^m$ .

If  $F$  is differentiable at  $\mathbf{x}$  with Jacobian  $\nabla F(\mathbf{x}) \in \mathbb{R}^{l \times m}$ , then  $F'(\mathbf{x}; \mathbf{h}) = \nabla F(\mathbf{x}) \mathbf{h}$ .

For index sets  $J, K \subset \{1, \dots, n\}$  and matrix  $\mathbf{M} \in \mathbb{S}^n$ , let  $\mathbf{M}_{JK}$  be the submatrix of  $\mathbf{M}$  constructed from the rows in  $J$  and the columns in  $K$ . The following lemma can be deduced from Sun and Sun [2002, Theorem 4.7]:

**Lemma A.2.** *Function  $\phi^\square$  is directionally differentiable at any  $\mathbf{X} \in \mathbb{S}^n$ . Its directional derivative along  $\mathbf{H} \in \mathbb{S}^n$  is*

$$(\phi^\square)'(\mathbf{X}; \mathbf{H}) = \mathbf{P} \begin{bmatrix} \phi_{KK}^{[1]}(\boldsymbol{\lambda}) \circ \tilde{\mathbf{H}}_{KK} & \phi_{KJ}^{[1]}(\boldsymbol{\lambda}) \circ \tilde{\mathbf{H}}_{KJ} \\ \phi_{JK}^{[1]}(\boldsymbol{\lambda}) \circ \tilde{\mathbf{H}}_{JK} & [\tilde{\mathbf{H}}_{JJ}]_+ \end{bmatrix} \mathbf{P}^T$$

where  $\mathbf{X} = \mathbf{P} \text{diag}(\lambda_1, \dots, \lambda_n) \mathbf{P}^T \in \mathbb{S}^n$  with  $\mathbf{P}$  satisfying  $\mathbf{P}^T \mathbf{P} = \mathbf{P} \mathbf{P}^T = \mathbf{I}$ ,  $K = \{i \in \{1, \dots, n\} : \lambda_i \neq 0\}$ ,  $J = \{i \in \{1, \dots, n\} : \lambda_i = 0\}$ , and  $\tilde{\mathbf{H}} = \mathbf{P}^T \mathbf{H} \mathbf{P}$ . Furthermore,  $\phi^\square$  is differentiable at  $\mathbf{X}$  if and only if  $\mathbf{X}$  is nonsingular, i.e.,  $J = \emptyset$ .

Now we can prove the lemma:

*Proof of Lemma A.1.* Suppose  $f$  is differentiable at  $\mu$ . Then if  $C(\mu)$  is nonsingular,  $\mathcal{N}(C(\mu)) = \{\mathbf{0}\}$  and  $e \in \mathcal{N}(C(\mu))^\perp$ . If  $C(\mu)$  is singular, then the two one-sided limits

$$\lim_{t \downarrow 0} \frac{f(\mu + t) - f(\mu)}{t} \quad \text{and} \quad \lim_{t \downarrow 0} \frac{f(\mu - t) - f(\mu)}{-t}$$

must coincide. The first limit is equal to

$$\begin{aligned} -e^T \left( \lim_{t \downarrow 0} \frac{\phi^\square(C(\mu + t)) - \phi^\square(C(\mu))}{t} \right) e &= -e^T \left( \lim_{t \downarrow 0} \frac{\phi^\square(C(\mu) - tee^T) - \phi^\square(C(\mu))}{t} \right) e \\ &= -e^T (\phi^\square)'(C(\mu); -ee^T) e \\ &= e^T \mathbf{P} \begin{bmatrix} \phi_{KK}^{[1]}(\boldsymbol{\lambda}) \circ (\mathbf{P}^T ee^T \mathbf{P})_{KK} & \phi_{KJ}^{[1]}(\boldsymbol{\lambda}) \circ (\mathbf{P}^T ee^T \mathbf{P})_{KJ} \\ \phi_{JK}^{[1]}(\boldsymbol{\lambda}) \circ (\mathbf{P}^T ee^T \mathbf{P})_{JK} & -[(\mathbf{P}^T ee^T \mathbf{P})_{JJ}]_+ \end{bmatrix} \mathbf{P}^T e \end{aligned}$$

by Lemma A.2, for a spectral decomposition of  $C(\mu) = \mathbf{P} \text{diag}(\lambda_1, \dots, \lambda_n) \mathbf{P}^T$  satisfying the conditions of the lemma. Likewise, the second limit equals

$$e^T (\phi^\square)'(C(\mu); ee^T) e = e^T \mathbf{P} \begin{bmatrix} \phi_{KK}^{[1]}(\boldsymbol{\lambda}) \circ (\mathbf{P}^T ee^T \mathbf{P})_{KK} & \phi_{KJ}^{[1]}(\boldsymbol{\lambda}) \circ (\mathbf{P}^T ee^T \mathbf{P})_{KJ} \\ \phi_{JK}^{[1]}(\boldsymbol{\lambda}) \circ (\mathbf{P}^T ee^T \mathbf{P})_{JK} & [(\mathbf{P}^T ee^T \mathbf{P})_{JJ}]_+ \end{bmatrix} \mathbf{P}^T e.$$

Let  $\mathbf{P}^T e = [\mathbf{q}_K, \mathbf{q}_J]^T = \mathbf{q}$  where  $\mathbf{q}_K \in \mathbb{R}^{|K|}$  and  $\mathbf{q}_J \in \mathbb{R}^{|J|}$ . Note  $J \neq \emptyset$  since  $C(\mu)$  is singular. Then the two limits are equal if and only if  $\mathbf{q}_J^T [(\mathbf{q}\mathbf{q}^T)_{JJ}]_+ \mathbf{q}_J = 0$ . It is immediate to see that  $(\mathbf{q}\mathbf{q}^T)_{JJ} = \mathbf{q}_J \mathbf{q}_J^T \succeq \mathbf{0}$ , hence  $\mathbf{q}_J^T [(\mathbf{q}\mathbf{q}^T)_{JJ}]_+ \mathbf{q}_J = \|\mathbf{q}_J\|^4$ . This implies  $\mathbf{q}_J = \mathbf{0}$ . Finally, observe that  $\mathbf{q}_J = \mathbf{P}_J^T e$  where the columns of  $\mathbf{P}_J$  span  $\mathcal{N}(C(\mu))$ . Thus the condition  $\mathbf{q}_J = \mathbf{P}_J^T e = \mathbf{0}$  is equivalent to  $e \in \mathcal{N}(C(\mu))^\perp$ .

Now suppose  $e \in \mathcal{N}(C(\mu))^\perp$ . If  $C(\mu)$  is nonsingular, then Lemma A.2 implies that  $f$  is differentiable at  $\mu$ . If  $C(\mu)$  is singular, then  $\mathbf{P}_J^T e = \mathbf{0}$  and the two one-sided limits in the above paragraph coincide, i.e.,  $f$  is differentiable at  $\mu$ .

Equation (A.1) is a consequence of the coincidence of the one-sided limits, that the common limit does not depend on the order of  $\lambda_1, \dots, \lambda_n$ , and the definition of  $\phi^{[1]}$  in equation (18).  $\square$

## A.2 Proof of Theorem 2

For a solution  $\mu^*$  to the equation  $f(\mu) = 0$ , define a collection of matrices related to the eigenvalues  $\boldsymbol{\lambda}^* = (\lambda_1^*, \dots, \lambda_n^*)^T$  of  $C(\mu^*)$ :

$$\mathcal{M} = \{\mathbf{M} = (m_{ij}) \in \mathbb{S}^n : m_{ij} = \phi^{[1]}(\boldsymbol{\lambda}^*) \text{ if } \lambda_i^* \neq 0 \text{ or } \lambda_j^* \neq 0; m_{ij} \in [0, 1] \text{ if } \lambda_i^* = 0 = \lambda_j^*\}.$$

Also define the set (Bouligand subdifferential)

$$\partial_B f(\mu^*) = \left\{ \lim_{k \rightarrow \infty} f'(\mu_k) : \mu_k \rightarrow \mu^*, \mu_k \in D_f \right\}$$

where  $D_f$  denotes the set of points in which  $f$  is differentiable, so that  $\partial f(\mu^*) = \text{conv } \partial_B f(\mu^*)$ . The following lemma shows a representation of an element of this set in terms of  $\mathcal{M}$ :

**Lemma A.3.** *Suppose a spectral decomposition of  $C(\mu^*)$  is  $\mathbf{P}^* \text{diag}(\lambda_1^*, \dots, \lambda_n^*) \mathbf{P}^{*T}$  with  $\mathbf{P}^{*T} \mathbf{P}^* = \mathbf{P}^* \mathbf{P}^{*T} = \mathbf{I}$ . Then, for any  $v \in \partial_B f(\mu^*)$ , there exists  $\mathbf{M} \in \mathcal{M}$  such that*

$$v = e^T \mathbf{P}^* (\mathbf{M} \circ (\mathbf{P}^{*T} ee^T \mathbf{P}^*)) \mathbf{P}^{*T} e.$$

*Proof.* By the definition of  $\partial_B f(\mu^*)$ , there exists a sequence  $\{\mu_k\}$  such that  $f$  is differentiable at each  $\mu_k$ ,  $\mu_k \rightarrow \mu^*$ , and  $f'(\mu_k) \rightarrow v$  as  $k \rightarrow \infty$ . Obviously  $\mu_k \neq \mu$  for all  $k$ . Thus  $C(\mu_k) = \bar{\mathbf{X}} - \mu_k ee^T = C(\mu) - (\mu_k - \mu) ee^T$  is a symmetric rank-1 perturbation of  $C(\mu)$ . Then, by Chen et al. [2003, Lemma 3.3], Rellich and Berkowitz [1969, Thm. 1],  $C(\mu_k)$  has a spectral decomposition  $\mathbf{P}_k \text{diag}(\lambda_{k,1}, \dots, \lambda_{k,n}) \mathbf{P}_k^T$  such that  $\mathbf{P}_k \rightarrow \mathbf{P}^*$  as  $k \rightarrow \infty$ , by passing to a subsequence of

$\{\mu_k\}$  if necessary. Since  $\lambda_{k,i} = (\mathbf{P}_k^T \mathbf{C}(\mu_k) \mathbf{P}_k)_{ii}$  and  $\mathbf{C}(\mu)$  is continuous in  $\mu$ , it follows that  $\lim_{k \rightarrow \infty} \lambda_{k,i} = \lambda_i$  as well, for  $i = 1, \dots, n$ .

By Lemma A.1,

$$f'(\mu_k) = \mathbf{e}^T \mathbf{P}_k (\phi^{[1]}(\boldsymbol{\lambda}_k) \circ (\mathbf{P}_k^T \mathbf{e} \mathbf{e}^T \mathbf{P}_k)) \mathbf{P}_k^T \mathbf{e}.$$

Let

$$K = \{i \in \{1, \dots, n\} : \lambda_i^* \neq 0\}, \quad J = \{i \in \{1, \dots, n\} : \lambda_i^* = 0\}$$

and  $\delta = \frac{1}{2} \min_{i \in K} |\lambda_i^*| > 0$ . Then for all sufficiently large  $k$ , we have  $\max_{i=1, \dots, n} |\lambda_{k,i} - \lambda_i^*| \leq \delta$ . If  $i \in K$  or  $j \in K$ , then  $\lambda_{k,i} \neq 0$  or  $\lambda_{k,j} \neq 0$ , and

$$\phi_{ij}^{[1]}(\boldsymbol{\lambda}_k) = \frac{(\lambda_{k,i})_+ + (\lambda_{k,j})_+}{|\lambda_{k,i}| + |\lambda_{k,j}|} \rightarrow \frac{(\lambda_i^*)_+ + (\lambda_j^*)_+}{|\lambda_i^*| + |\lambda_j^*|} = \phi_{ij}^{[1]}(\boldsymbol{\lambda}^*).$$

If  $i, j \in J$ , then both  $\lambda_{k,i}$  and  $\lambda_{k,j}$  converge to 0. Since  $\phi_{i,j}(\lambda_k) \in [0, 1]$  in this case, passing to a subsequence of  $\{\mu_k\}$  if necessary,  $\phi_{i,j}(\lambda_k)$  converges to a point  $m_{ij} \in [0, 1]$ . This shows that  $\phi^{[1]}(\boldsymbol{\lambda}_k) \rightarrow \mathbf{M} \in \mathcal{M}$ .

Finally, by the continuity of matrix multiplications, we have

$$v = \lim_{k \rightarrow \infty} f'(\mu_k) = \mathbf{e}^T \mathbf{P}^* (\mathbf{M} \circ (\mathbf{P}^{*T} \mathbf{e} \mathbf{e}^T \mathbf{P}^*)) \mathbf{P}^{*T} \mathbf{e}.$$

□

The next lemma provides a technical result useful for proving Theorem 2.

**Lemma A.4.** For  $\mathbf{P}^* = (p_{ij})$  and  $\lambda_1^*, \dots, \lambda_n^*$  in the statement of Lemma A.3, let  $K_+ = \{i \in \{1, \dots, n\} : \lambda_i^* > 0\}$ . Then  $K_+ \neq \emptyset$  and

$$\sum_{i \in K_+} p_{ni}^2 > 0.$$

*Proof.* Denote the  $i$ th column of  $\mathbf{P}$  by  $\mathbf{p}_i = (p_{1i}, \dots, p_{ni})^T$ . Then  $\phi^\square(\mathbf{C}(\mu^*)) = [\mathbf{C}(\mu^*)]_+ = \sum_{i \in K_+} \lambda_i^* \mathbf{p}_i \mathbf{p}_i^T$ . From the optimality condition

$$1 = \mathbf{e}^T \phi^\square(\mathbf{C}(\mu^*)) \mathbf{e} = \sum_{i \in K_+} \lambda_i^* p_{ni}^2.$$

If  $K_+ = \emptyset$  then the rightmost hand side is zero, a contradiction. That  $K_+ \neq \emptyset$  and  $\lambda_i^* > 0$  for all  $i \in K_+$  succumbs to the fact  $\sum_{i \in K_+} p_{ni}^2 > 0$ . □

Now we are ready to prove the theorem.

*Proof of Theorem 2.* Let  $v \in \partial f_B(\mu^*)$ . Also let  $J, K$ , and  $K_+$  be as defined in the proof of Lemma A.3 and the statement of Lemma A.4. Define  $K_- = K \setminus K_+$ . Then by Lemma A.3 there exists  $\mathbf{M} = (m_{ij}) \in \mathbb{S}^n$  such that

$$m_{ij} = \begin{cases} 1, & \text{if } i \in K_+, j \in K_+ \cup J, \text{ or } i \in J, j \in K_+, \\ 0, & \text{if } i \in J, j \in K_-, \text{ or } i \in K_-, j \in J \cup K_-, \\ \tau_{ij} = \frac{\lambda_i^*}{\lambda_i^* - \lambda_j^*} \in (0, 1), & \text{if } i \in K_+, j \in K_-, \text{ or } i \in K_-, j \in K_+, \\ \in [0, 1], & \text{if } i, j \in J. \end{cases}$$

and

$$v = \mathbf{e}^T \mathbf{P}^* [\mathbf{M} \circ (\mathbf{P}^{*T} \mathbf{e} \mathbf{e}^T \mathbf{P}^*)] \mathbf{P}^{*T} \mathbf{e}$$

Then,

$$\begin{aligned}
v &= \text{Tr}(e^T \mathbf{P}^* [M \circ (\mathbf{P}^{*T} e e^T \mathbf{P}^*)] \mathbf{P}^{*T} e) \\
&= \text{Tr}(\mathbf{P}^{*T} e e^T P [M \circ (\mathbf{P}^{*T} e e^T \mathbf{P}^*)]) \\
&= \text{Tr}(\mathbf{Q} [M \circ \mathbf{Q}]), \quad \text{where } \mathbf{Q} = \mathbf{P}^{*T} e e^T \mathbf{P}^* = (q_{ij}) \\
&\geq \sum_{i \in K_+} \left( \sum_{j \in K_+ \cup J} q_{ij}^2 + \sum_{j \in K_-} \tau_{ij} q_{ij}^2 \right) \quad (\text{since } m_{ij} \geq 0) \\
&\geq \left( \min_{i \in K_+, j \in K_-} \tau_{ij} \right) \sum_{i \in K_+} \sum_{j=1}^n q_{ij}^2.
\end{aligned}$$

Since  $\mathbf{P}^{*T} e = (p_{n1}, \dots, p_{nn})^T$  is the last row of  $\mathbf{P}^*$ , we have  $q_{ij} = p_{ni} p_{nj}$  and

$$\sum_{i \in K_+} \sum_{j=1}^n q_{ij}^2 = \sum_{i \in K_+} \sum_{j=1}^n p_{ni}^2 p_{nj}^2 = \left( \sum_{i \in K_+} p_{ni}^2 \right) \left( \sum_{j=1}^n p_{nj}^2 \right) > 0.$$

The quantity is the first pair of parentheses is positive due to Lemma A.4. The second quantity equals to  $e^T \mathbf{P}^* \mathbf{P}^{*T} e = e^T e = 1$ . From this and  $\tau_{ij} > 0$  for all  $i \in K_+$  and  $j \in K_-$ , it follows that  $v > 0$ .

Since  $\partial_B f(\mu^*)$  is compact and all the elements of this set is positive, and convex combination of its elements is also positive. It follows that every element of  $\partial f(\mu^*) = \text{conv } \partial_B f(\mu^*)$  is positive.

The uniqueness of solution then follows from Clarke's inverse function theorem [Clarke, 1990, Thm. 7.1.1]; existence of solution is shown in Section 2 of the main text.  $\square$

### A.3 Proof of Theorem 4

The proof of Theorem 4 also requires Lemma A.1.

*Proof of Theorem 4.* If  $f$  is differentiable at  $\mu$ , then  $\partial f(\mu) = \{f'(\mu)\}$  and the result holds by Lemma A.1. Otherwise, consider a sequence  $\{\mu_k\}$  such that  $\mu_k \downarrow \mu$  and  $f$  is differentiable at each  $\mu_k$ . Such a sequence exists since  $f$  is Lipschitz hence almost everywhere differentiable [Rockafellar and Wets, 2009, sec. 9J]. Obviously  $\mu_k > \mu$  for all  $k$ . Thus  $\mathbf{C}(\mu_k) = \bar{\mathbf{X}} - \mu_k e e^T = \mathbf{C}(\mu) - (\mu_k - \mu) e e^T$  is a symmetric rank-1 perturbation of  $\mathbf{C}(\mu)$ . Then, by Chen et al. [2003, Lemma 3.3], Rellich and Berkowitz [1969, Thm. 1],  $\mathbf{C}(\mu_k)$  has a spectral decomposition  $\mathbf{P}_k \text{diag}(\lambda_{k,1}, \dots, \lambda_{k,n}) \mathbf{P}_k^T$  such that  $\mathbf{P}_k \rightarrow \mathbf{P}$  as  $k \rightarrow \infty$ , by passing to a subsequence if necessary. Since  $\lambda_{k,i} = (\mathbf{P}_k^T \mathbf{C}(\mu_k) \mathbf{P}_k)_{ii}$  and  $\mathbf{C}(\mu)$  is continuous in  $\mu$ , it follows that  $\lim_{k \rightarrow \infty} \lambda_{k,i} = \lambda_i$  as well, for  $i = 1, \dots, n$ . Moreover,  $\lambda_{k,i} \leq \lambda_i$  for all  $i$  [Bunch et al., 1978]. Thus if  $\lambda_i = 0 = \lambda_j$ , then  $\lambda_{k,i}, \lambda_{k,j} \uparrow 0$ , which implies that  $\lim_{k \rightarrow \infty} \phi^{[1]}(\boldsymbol{\lambda}_k) = \phi^{[1]}(\boldsymbol{\lambda})$ . Now since from Lemma A.1,

$$f'(\mu_k) = e^T \mathbf{P}_k (\phi^{[1]}(\boldsymbol{\lambda}_k) \circ (\mathbf{P}_k^T e e^T \mathbf{P}_k)) \mathbf{P}_k^T e, \quad \boldsymbol{\lambda}_k = (\lambda_{k,1}, \dots, \lambda_{k,n})^T,$$

it follows that  $\lim_{k \rightarrow \infty} f'(\mu_k) = v$ . From Definition 1, we see  $v \in \partial f(\mu)$ .  $\square$

## B Applications to proximal algorithms

### B.1 Heteroskedastic scaled lasso

In the heteroskedastic scaled lasso we want to minimize

$$\ell(\boldsymbol{\Omega}, \boldsymbol{\beta}) = \phi(\boldsymbol{\Omega}, \mathbf{X}\boldsymbol{\beta} - \mathbf{y}) + \frac{1}{2\sqrt{N}} \|\boldsymbol{\Omega}\|_F + \lambda \|\boldsymbol{\beta}\|_1. \quad (\text{B.1})$$

If we define the affine map  $\mathcal{K} : (\boldsymbol{\Omega}, \boldsymbol{\beta}) \mapsto (\boldsymbol{\Omega}, \mathbf{X}\boldsymbol{\beta} - \mathbf{y})$ , then problem (B.1) has the form (5), where  $f(\boldsymbol{\Omega}, \boldsymbol{\beta}) \equiv 0$ ,  $g(\boldsymbol{\Omega}, \boldsymbol{\beta}) = \frac{1}{2\sqrt{N}} \|\boldsymbol{\Omega}\|_F + \lambda \|\boldsymbol{\beta}\|_1$ , and  $h = \phi$ . The adjoint  $\mathcal{K}^T$  of the linear part of  $\mathcal{K}$

maps  $(\Theta, \zeta) \in \mathbb{S}^p \times \mathbb{R}^p$  to  $(\Theta, \mathbf{X}^T \zeta)$ . Thus the resulting PDHG iteration is

$$\begin{aligned}\Omega^{k+1} &= \left(1 - \frac{\tau/(2\sqrt{N})}{\max[\|\mathbf{Y}\|_F, \tau/(2\sqrt{N})]}\right) \mathbf{Y}, \quad \mathbf{Y} = \Omega^k - \tau\Theta^k, \\ \beta^{k+1} &= S_{\tau\lambda}(\beta^k - \tau\mathbf{X}^T \zeta^k), \\ \tilde{\Omega}^{k+1} &= 2\Omega^{k+1} - \Omega^k, \\ \tilde{\beta}^{k+1} &= 2\beta^{k+1} - \beta^k, \\ (\Theta^{k+1}, \zeta^{k+1}) &= \text{prox}_{\sigma\phi^*}(\Theta^k + \sigma\tilde{\Omega}^{k+1}, \zeta^k + \sigma(\mathbf{X}\tilde{\beta}^{k+1} - \mathbf{y})).\end{aligned}$$

where  $S_{\tau\lambda}$  is the usual soft-thresholding operator:  $[S_{\tau\lambda}(x)]_i = \min(\max(x_i - \tau\lambda, 0), x_i + \tau\lambda)$ .

In order to determine the step sizes, note  $\mathcal{K}^T \mathcal{K} : (\Omega, \beta) \mapsto (\Omega, \mathbf{X}^T \mathbf{X} \beta - \mathbf{X}^T \mathbf{y})$ . The norm of the linear part of this affine operator equals  $\max(\|\mathbf{X}^T \mathbf{X}\|_2, 1) = \max(\|\mathbf{X}\|_2^2, 1) \leq \max(\|\mathbf{X}\|_F^2, 1)$ .

**Setup for experiments** For all combinations of  $(N, p)$  in Table 2, data matrix  $\mathbf{X} \in \mathbb{R}^{N \times p}$  were generated from zero-mean independent Gaussian. Each  $x_i$  was then scaled to have norm  $1/\sqrt{p}$ , so that  $\|\mathbf{X}\|_F = 1$ . Response vector  $\mathbf{y}$  was generated by setting  $\mathbf{y} = \mathbf{X}\beta + \epsilon$ , where the first five components of  $\beta$  were independently generated from  $\mathcal{N}(0, 10^2)$  and the rest set to zero; noise vector  $\epsilon$  was generated from zero-mean  $n$ -variate Gaussian with covariance matrix of compound symmetry

$$\Sigma = \begin{bmatrix} 1 & \rho & \rho & \dots & \rho \\ \rho & 1 & \rho & \dots & \rho \\ \vdots & & \ddots & & \vdots \\ \rho & \rho & \rho & \dots & 1 \end{bmatrix}$$

with  $\rho = 0.5$ . The regularization parameter  $\lambda = 0.005$ . The PDHG iteration was initialized by  $\Omega^0 = \mathbf{I}_N$ ,  $\beta^0 = \mathbf{0}$ ,  $\Theta^0 = \mathbf{0}$ , and  $\zeta^0 = \mathbf{0}$ . The step size parameters are  $\tau = 0.99$  and  $\sigma = 0.99$ . Convergence was declared when the relative change of the primal variables  $(\Omega^k, \beta^k)$  was less than  $10^{-6}$  for  $p < 300$  and  $10^{-5}$  for  $p \geq 300$ . The maximum number of iterations was set to 50000.

## B.2 Gaussian joint likelihood estimation

Joint maximum likelihood estimation (MLE) of Gaussian natural parameters  $(\Omega, \eta)$  under the variance constraints

$$\begin{aligned}\text{minimize} \quad & \ell(\Omega, \eta) = -\log \det \Omega + \text{Tr}(\Omega \mathbf{S}) - 2\bar{\mu}^T \eta + \phi(\Omega, \eta) + \frac{\epsilon}{2} \|\Omega\|_F^2 \\ \text{subject to} \quad & \mathbf{c}_i^T \Omega^{-1} \mathbf{c}_i \leq 1, \quad i = 1, \dots, m\end{aligned} \quad (\text{B.2})$$

(the ridge penalty  $\frac{\epsilon}{2} \|\Omega\|_F^2$  is added to ensure existence of the solution) has the form (5) if we define

$$\begin{aligned}f(\Omega, \eta) &= 0 \\ g(\Omega, \eta) &= -\log \det \Omega + \text{Tr}(\Omega \mathbf{S}) - 2\bar{\mu}^T \eta + \frac{\epsilon}{2} \|\Omega\|_F^2 \\ h(\mathbf{Z}_0, \mathbf{Z}_1, \dots, \mathbf{Z}_m, \eta) &= \phi(\mathbf{Z}_0, \eta) + \sum_{i=1}^m \iota_{C_i}(\mathbf{Z}_i), \quad C_i = \{\Omega \in \mathbb{S}^p : \mathbf{c}_i^T \Omega^{-1} \mathbf{c}_i \leq 1\},\end{aligned}$$

and the linear map  $\mathcal{K} : (\Omega, \eta) \mapsto (\Omega, \Omega, \dots, \Omega, \eta) \in \prod_{i=0}^m \mathbb{S}^p \times \mathbb{R}^p$ .

Since the adjoint  $\mathcal{K}^T$  of  $\mathcal{K}$  maps  $(\Theta_0, \Theta_1, \dots, \Theta_m, \zeta) \in \prod_{i=0}^m \mathbb{S}^p \times \mathbb{R}^p$  to  $(\sum_{i=0}^m \Theta_i, \zeta)$ , the PDHG iteration for problem (B.2) entails

$$\begin{aligned}\Omega^{k+1} &= \mathbf{prox}_{-\frac{\tau}{1+\epsilon\tau} \log \det(\cdot)} \left( \frac{1}{1+\epsilon\tau} (\Omega^k - \tau \sum_{i=0}^m \Theta_i^k - \tau \mathcal{S}) \right), \\ \eta^{k+1} &= \eta^k - \tau \zeta^k + 2\tau \bar{\mu}, \\ \tilde{\Omega}^{k+1} &= 2\Omega^{k+1} - \Omega^k, \\ \tilde{\eta}^{k+1} &= 2\eta^{k+1} - \eta^k, \\ (\Theta_0^{k+1}, \zeta^{k+1}) &= \mathbf{prox}_{\sigma\phi^*} \left( \Theta_0^k + \sigma \tilde{\Omega}^{k+1}, \zeta^k + \sigma \tilde{\eta}^{k+1} \right), \\ \Theta_i^{k+1} &= \mathbf{prox}_{\sigma\nu_{C_i}^*} \left( \Theta_i^k + \sigma \tilde{\Omega}^{k+1} \right), \quad i = 1, \dots, m.\end{aligned}$$

It is well-known that

$$\mathbf{prox}_{-\tau \log \det(\cdot)}(M) = Q \operatorname{diag} \left( \frac{\mu_1 + \sqrt{\mu_1^2 + 4\tau}}{2}, \dots, \frac{\mu_p + \sqrt{\mu_p^2 + 4\tau}}{2} \right) Q^T$$

if the eigenvalue decomposition of  $M \in \mathbb{S}^p$  is  $Q \operatorname{diag}(\mu_1, \dots, \mu_p) Q^T$ .

It remains to compute  $\mathbf{prox}_{\sigma\nu_{C_i}^*}$ . The following result shows it has a closed-form expression.

**Proposition B.1.** *Let  $S_{c,\alpha} = \{\Omega \in \mathbb{S}^p : \phi(\Omega, c) \leq \alpha\}$  where  $\alpha > 0$ . Then  $S_{c,\alpha}$  is closed and convex. Furthermore, the projection of  $Z \in \mathbb{S}^p$  onto  $S_{c,\alpha}$  is*

$$P_{S_{c,\alpha}}(Z) = \left( Z - \frac{1}{2\alpha} cc^T \right)_+ + \frac{1}{2\alpha} cc^T.$$

Therefore, from the Moreau decomposition (7), for  $i = 1, \dots, m$ ,

$$\begin{aligned}\mathbf{prox}_{\sigma\nu_{C_i}^*}(Y) &= Y - \sigma P_{S_{c_i, 1/2}}(\sigma^{-1}Y) = \sigma \left( \frac{1}{\sigma} Y - c_i c_i^T \right) - \sigma \left( \frac{1}{\sigma} Y - c_i c_i^T \right)_+ \\ &= -\sigma \left( c_i c_i^T - \frac{1}{\sigma} Y \right)_+.\end{aligned}$$

Finally, to determine the step sizes, note  $\mathcal{K}^T \mathcal{K} : (\Omega, \eta) \mapsto ((m+1)\Omega, \eta)$ . Hence  $\|\mathcal{K}^T \mathcal{K}\|_2 = m+1$ .

*Proof of Proposition B.1.* Convexity and closedness of  $S_{c,\alpha}$  follows from those of  $\phi$ . The projection operator is

$$\begin{aligned}P_{S_{c,\alpha}}(Z) &= \arg \min_{\Omega \in \mathbb{S}^p} \frac{1}{2} \|\mathcal{Z} - \Omega\|_F^2 \text{ subject to } \phi(\Omega, c) \leq \alpha \\ &= \arg \min_{\Omega \in \mathbb{S}^p} \frac{1}{2} \|\mathcal{Z} - \Omega\|_F^2 \text{ subject to } \frac{1}{2} c^T \Omega^\dagger c \leq \alpha, c \in \mathcal{R}(\Omega) \\ &= \arg \min_{\Omega \in \mathbb{S}^p} \frac{1}{2} \|\mathcal{Z} - \Omega\|_F^2 \text{ subject to } \alpha - \frac{1}{2} c^T \Omega^\dagger c \geq 0, c \in \mathcal{R}(\Omega) \\ &= \arg \min_{\Omega \in \mathbb{S}^p} \frac{1}{2} \|\mathcal{Z} - \Omega\|_F^2 \text{ subject to } \Omega - \frac{1}{2\alpha} cc^T \succeq \mathbf{0} \\ &= \arg \min_{\Omega \in \mathbb{S}^p} \frac{1}{2} \left\| \mathcal{Z} - \frac{1}{2\alpha} cc^T - \left( \Omega - \frac{1}{2\alpha} cc^T \right) \right\|_F^2 \text{ subject to } \Omega - \frac{1}{2\alpha} cc^T \succeq \mathbf{0} \\ &= \left( \mathcal{Z} - \frac{1}{2\alpha} cc^T \right)_+ + \frac{1}{2\alpha} cc^T.\end{aligned}$$

The fourth equality is due to the Schur complements of

$$\begin{bmatrix} \Omega & -\frac{1}{\sqrt{2}}c \\ -\frac{1}{\sqrt{2}}c^T & \alpha \end{bmatrix} \succeq \mathbf{0}.$$

The last equality is from the fact  $\arg \min_{\mathbf{X} \succeq \mathbf{0}} \frac{1}{2} \|\mathcal{Z} - \mathbf{X}\|_F^2 = \mathcal{Z}_+$ .  $\square$

**Setup for experiments** For all combinations of  $(N, p)$  in Table 2, data  $\mathbf{x}_1, \dots, \mathbf{x}_N \in \mathbb{R}^p$  were generated from zero-mean multivariate Gaussian with covariance matrix of compound symmetry

$$\Sigma = \begin{bmatrix} 1 & \rho & \rho & \dots & \rho \\ \rho & 1 & \rho & \dots & \rho \\ \vdots & & \ddots & & \vdots \\ \rho & \rho & \rho & \dots & 1 \end{bmatrix}$$

with  $\rho = 0.3$ . The PDHG iteration used  $\epsilon = 10/p^2$  and was initialized by

$$\begin{aligned} \Omega^0 &= (\mathbf{S} - \boldsymbol{\mu}\boldsymbol{\mu}^T + 10^{-2}\mathbf{I}_p)^{-1} \\ \eta^0 &= \Omega^0 \bar{\boldsymbol{\mu}} \\ \Theta_i^0 &= \Omega^0, \quad i = 0, 1, \dots, m \\ \zeta^0 &= \eta^0. \end{aligned}$$

The step size parameters are  $\tau = 1$  and  $\sigma = 1/(m+1)$ . Convergence was declared when the relative change of the primal variables  $(\Omega^k, \eta^k)$  was less than  $10^{-5}$ . The maximum number of iterations was set to 50000.

### B.3 Graphical model selection

Recall from equation (3) we want to minimize

$$-\frac{1}{N}PL(\Omega) + \lambda|\Omega|_1 = -\frac{1}{2} \sum_{i=1}^p \log \omega_{ii} + \phi(\mathcal{K}\Omega) + \lambda \sum_{i<j} |\omega_{ij}|. \quad (\text{B.3})$$

This has the form (5) if we define  $f(\Omega) \equiv 0$ ,  $g(\Omega) = -\frac{1}{2} \sum_{i=1}^p \log \omega_{ii} + \lambda \sum_{i<j} |\omega_{ij}|$ ,  $h = \phi$ , and the linear map  $\mathcal{K} : \Omega \mapsto \frac{1}{N}(\mathbf{I}_N \otimes \Omega_D, \text{vec}(\Omega \mathbf{Y}^T))$ . The adjoint of  $\mathcal{K}$  is

$$\mathcal{K}^T : (\mathbf{M}, \text{vec}(\mathbf{Z})) \mapsto \frac{1}{N} \sum_{i=1}^N \mathbf{M}_{ii,D} + \frac{1}{2N} (\mathbf{Z}\mathbf{Y} + \mathbf{Y}^T \mathbf{Z}^T),$$

for symmetric block matrix  $\mathbf{M} = (\mathbf{M}_{ij}) \in \mathbb{S}^{Np}$  with  $\mathbf{M}_{ij} = \mathbf{M}_{ji}^T \in \mathbb{R}^{p \times p}$ , and  $\mathbf{Z} \in \mathbb{R}^{p \times N}$ . Then the PDHG iteration for problem (B.3) is

$$\begin{aligned} \Omega^{k+1} &= \text{prox}_{\tau g} \left( \Omega^k - \frac{\tau}{N} \left( \sum_{i=1}^N \Theta_{ii,D}^k + \frac{1}{2} \mathbf{Z}^k \mathbf{Y} + \frac{1}{2} \mathbf{Y}^T [\mathbf{Z}^k]^T \right) \right) \\ \tilde{\Omega}^{k+1} &= 2\Omega^{k+1} - \Omega^k \\ (\Theta^{k+1}, \text{vec}(\mathbf{Z}^{k+1})) &= \text{prox}_{\sigma \phi^*} \left( \Theta^k + \frac{\sigma}{N} (\mathbf{I}_N \otimes \tilde{\Omega}_D^{k+1}), \text{vec}(\mathbf{Z}^k + \frac{\sigma}{N} \tilde{\Omega}^{k+1} \mathbf{Y}^T) \right) \end{aligned}$$

where  $\Omega^k, \tilde{\Omega}^k \in \mathbb{S}^p$ ,  $\mathbf{Z}^k \in \mathbb{R}^{p \times N}$ , and  $\Theta^k = (\Theta_{ij}^k) \in \mathbb{S}^{Np}$ , with  $\Theta_{ij} = \Theta_{ji}^T \in \mathbb{R}^{p \times p}$ . Operator  $\text{prox}_{\tau g}$  has a closed form expression. For  $\mathbf{W} = (w_{ij})$ ,

$$[\text{prox}_{\tau g}(\mathbf{W})]_{ij} = \begin{cases} \frac{1}{2}(w_{ii} + \sqrt{w_{ii}^2 + 2\tau}), & i = j, \\ S_{\tau\lambda/2}(w_{ij}), & i \neq j. \end{cases}$$

It is easy to see that  $\mathcal{K}^T \mathcal{K} : \Omega \mapsto \frac{1}{N} \Omega_D + \frac{1}{2N^2} (\Omega \mathbf{Y}^T \mathbf{Y} + \mathbf{Y}^T \mathbf{Y} \Omega)$ . Then  $\text{vec}(\frac{1}{N} \Omega_D + \frac{1}{2N^2} [\Omega \mathbf{Y}^T \mathbf{Y} + \Omega \mathbf{Y}^T \mathbf{Y}]) = \left( \frac{1}{N} \mathbf{A} + \frac{1}{2N^2} (\mathbf{Y}^T \mathbf{Y} \otimes \mathbf{I}_p + \mathbf{I}_p \otimes \mathbf{Y}^T \mathbf{Y}) \right) \text{vec}(\Omega)$  where  $\mathbf{A}$  satis-

ties  $\text{vec}(\Omega_D) = \mathbf{A} \text{vec}(\Omega)$ . It follows that  $\mathbf{A}^T \mathbf{A} = \mathbf{I}_{p^2}$  and  $\|\mathbf{A}\|_2 = 1$ . Therefore,

$$\begin{aligned} \|\mathcal{K}^T \mathcal{K}\|_2 &= \left\| \frac{1}{N} \mathbf{A} + \frac{1}{2N^2} (\mathbf{Y}^T \mathbf{Y} \otimes \mathbf{I}_p + \mathbf{I}_p \otimes \mathbf{Y} \mathbf{Y}^T) \right\|_2 \\ &\leq \frac{1}{N} \|\mathbf{A}\|_2 + \frac{1}{2N^2} \|\mathbf{Y}^T \mathbf{Y} \otimes \mathbf{I}_p\|_2 + \frac{1}{2N^2} \|\mathbf{I}_p \otimes \mathbf{Y}^T \mathbf{Y}\|_2 \\ &= \frac{1}{N} (1) + \frac{1}{2N^2} \lambda_{\max}(\mathbf{Y}^T \mathbf{Y}) + \frac{1}{2N^2} \lambda_{\max}(\mathbf{Y}^T \mathbf{Y}) \\ &= \frac{1}{N} + \frac{1}{N^2} \|\mathbf{Y}\|_2^2 \\ &\leq \frac{1}{N} + \frac{1}{N^2} \|\mathbf{Y}\|_F^2, \end{aligned}$$

which determines the step size.

**Setup for experiments** For all combinations of  $(N, p)$  in Table 2, data  $\mathbf{y}_1, \dots, \mathbf{y}_N \in \mathbb{R}^p$  were generated from zero-mean multivariate Gaussian with precision matrix

$$\Omega = 10\mathbf{I}_p + \Xi + \Xi^T,$$

where  $\Xi$  is a  $p \times p$  sparse random Gaussian matrix with 1 percent sparsity level. The regularization parameter  $\lambda = 0.1$ . The PDHG iteration was initialized by

$$\begin{aligned} \Omega^0 &= (\mathbf{S} + 10^{-2} \mathbf{I}_p)^{-1} \\ \Theta_i^0 &= \mathbf{I}_N \otimes \Omega_D^0 \\ \mathbf{Z}^0 &= \Omega^0 \mathbf{Y}^T. \end{aligned}$$

The step size parameters are  $\tau = 2$  and  $\sigma = 1/(2L_K)$  where  $L_K = 1/N + \|\mathbf{Y}\|_F^2/N^2$ . Convergence was declared when the relative change of the primal variable  $\Omega^k$  was less than  $10^{-5}$ . The maximum number of iterations was set to 50000. For the symmetric lasso used for comparison the implementation in the gconcord R package (<https://cran.r-project.org/web/packages/gconcord/index.html>) was used with the same input.

## References

- James R Bunch, Christopher P Nielsen, and Danny C Sorensen. Rank-one modification of the symmetric eigenproblem. *Numer. Math.*, 31(1):31–48, 1978.
- Xin Chen, Houduo Qi, and Paul Tseng. Analysis of nonsmooth symmetric-matrix-valued functions with applications to semidefinite complementarity problems. *SIAM J. Optim.*, 13(4):960–985, 2003.
- Frank H Clarke. *Optimization and Nonsmooth Analysis*. Society for Industrial and Applied Mathematics, Philadelphia, USA, 1990.
- Franz Rellich and Jerome Berkowitz. *Perturbation Theory of Eigenvalue Problems*. Gordon and Breach, New York, 1969.
- R Tyrrell Rockafellar and Roger J-B Wets. *Variational Analysis*, volume 317 of *Grundlehren der mathematischen Wissenschaften*. Springer Science & Business Media, New York, 2009.
- Defeng Sun and Jie Sun. Semismooth matrix-valued functions. *Math. Oper. Res.*, 27(1):150–169, 2002.
